# Supplementary material
Source: HighWire-hosted journal article supplement (http://www.cmaj.ca/highwire/filestream/58893/field_highwire_adjunct_files/0/ulcer-barkun-1-at.pdf)
Supplement: ulcer-barkun-1-at.pdf [file ulcer-barkun-1-at.pdf]

**Appendix 1 (as supplied by authors): Pre-Inclusion Questionnaire on Endoscopic resources**

**Have you participated in pharmaceutical sponsored trials in the past 3 years?**  
**if yes, is your institution currently involved in a retrospective chart review study in the area of gastroenterology?**  
**Is your institution aware of any upcoming chart review studies in the same area?**  
**How many patients are typically admitted to your hospital, with an upper GI bleed?**  
**Does your hospital have an electronic database of admitted patients?**  
**Are you able to search and identify all hospitalized patients in the hospital database who experienced an upper GI bleed?**  
**This institution treats a primarily urban/rural community**  
**What is the total number of beds in your institution?**  
**What is the total number of ICU beds?**  
**Does your institution have policies, procedures or guidelines on how to treat NVUGIB?**  
**Are you aware the CAG accepted international consensus guidelines, 2003 for treatment of NVUGIB?**  
**Do you use a hospital ethics committee or central ethics committee?**  
**If you work with a hospital ethics committee, would your ethics committee require patient consent for a retrospective chart review?**  
**How long do you anticipate the ethics review process to take at you site?**  
**When does your ethics board typically meet?**  
**Other than your ethics committee, do you require any other approval?**  
**Do you have access to high speed internet at your site?**  
**Does your hospital pharmacy have an electronic database?**  
**if yes, do you have access to your pharmacy electronic database to identify patients who treated for an episode of upper GI bleed?**  
**Does your institution implement starting orders for treating patients for that present with UGIB?**  
**Does your institution have an stop/substitution protocol for PPI or H2RA?**  
**Does your institution use doing templates UGIB patients?**  
**Would your pharmacy & therapeutic committee be willing to facilitate implementation/approval of protocol directed training?**  
**Do you currently have a research nurse?**  
**If no, would you be willing to hire a part time research nurse for a one-year period?**  
**A second/independent study nurse?**  
**Do you have a physical space to setup?**
